# Supplementary material
Source: Springer Nature journal article supplement (https://www.springermedizin.de/resource/supplementary/12888_2012_1464_MOESM3_ESM.pdf/9480360)

**Control****Rest (24h)****Rest (UP)****Rest (DOWN)****Activity (24h)**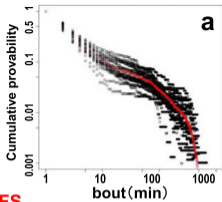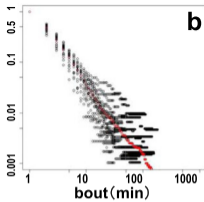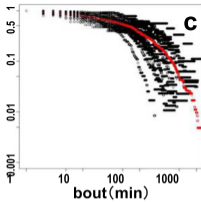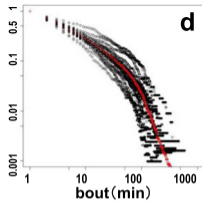**CCFS**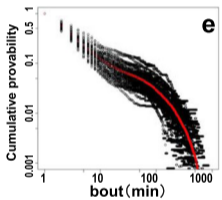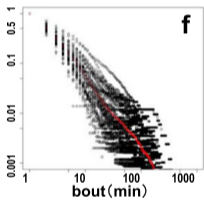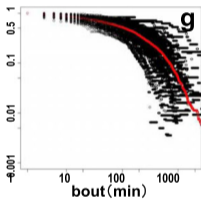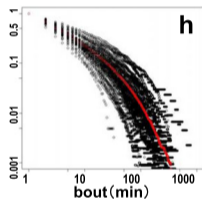**Control vs CCFS**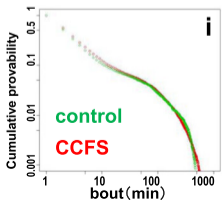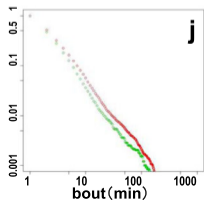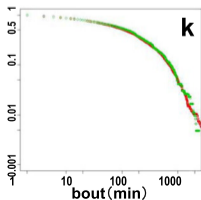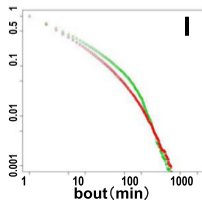

Supplement: MOESM3 [file 9480360]
